# Supplementary material
Source: PubMed Central journal article supplement (PMC4168540)
Supplement: gf524sup_10-1055-s-0032-1327812.pdf [file gf524sup_10-1055-s-0032-1327812.pdf]

# Kryokonservierung von Ovarialgewebe: detaillierte Beschreibung eines Verfahrens zum Transport, zum Einfrieren und zum Auftauen

## Cryopreservation of Ovarian Tissue: Detailed Description of Methods for Transport, Freezing and Thawing

**Autoren** V. Isachenko<sup>1</sup>, R. Dittrich<sup>2</sup>, G. Keck<sup>3</sup>, E. Isachenko<sup>1</sup>, G. Rahimi<sup>1</sup>, H. van der Ven<sup>4</sup>, M. Montag<sup>5</sup>, I. Hoffmann<sup>2</sup>, A. Müller<sup>2</sup>, W. Distler<sup>3</sup>, M. W. Beckmann<sup>2</sup>, P. Mallmann<sup>1</sup>

**Institute** Die Institutsangaben sind am Ende des Beitrags gelistet

### Schlüsselwörter

- Ovar
- Geburt
- Reproduktionsmedizin

### Key words

- ovary
- birth
- reproductive medicine

### Zusammenfassung

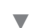

**Fragestellung:** Die Krebstherapie führt häufig zu einer irreversiblen Reduktion oder sogar zum Verlust der ovariellen Reserve. Eine vielversprechende Methode zur Bewahrung der Fertilität bei Frauen ist die Kryokonservierung von Ovarialgewebe mit anschließendem Auftauen und Re-transplantation des Gewebes nach überstandener Krebserkrankung. Bis heute wurden weltweit mehr als 25 Geburten nach einer Re-transplantation von kryokonserviertem Ovarialgewebe publiziert. In Deutschland kam es 2011 zur ersten Geburt nach Transplantation von kryokonserviertem Gewebe.

**Material und Methodik:** Nach der Entnahme des Ovarialgewebes an der Frauenklinik der Universität Dresden wurde dieses Gewebe im speziellen Transport-Container bei 5°C an die Frauenklinik der Universität Bonn geschickt und am nächsten Tag in einer 1,5-M-Dimethylsulfoxidlösung eingefroren. Im Jahr 2010 wurde in der Frauenklinik des Universitätsklinikums Erlangen dieses Ovarialgewebe aufgetaut und nach Ausverdünnung des Gefrierschutzmittels der Patientin laparoskopisch retransplantiert.

**Ergebnisse:** Es kam zu einer Schwangerschaft, die vollkommen unauffällig verlief und zur Geburt eines gesunden Jungen in der Universitätsfrauenklinik in Dresden.

**Schlussfolgerung:** Das Einfrieren des Ovarialgewebes nach der hier vorgestellten Methode ist geeignet, um die Fruchtbarkeit bei Krebspatienten zu bewahren.

### Einleitung

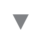

Aufgrund der zunehmenden Wirksamkeit der onkologischen Behandlungen und der guten Langzeitprognose überleben immer mehr Patientinnen die Krebserkrankung und können ein norma-

### Abstract

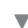

**Purpose:** In many cases cancer therapy leads to an irreversible reduction or even loss of ovarian reserve. Cryopreservation of ovarian tissue with subsequent thawing and re-transplantation of tissue after the cancer is in remission constitutes a promising method to preserve fertility in women. To date, more than 25 cases of live births after re-transplantation of cryopreserved ovarian tissue have been published worldwide. In Germany the first live birth after re-transplantation of cryopreserved tissue was in 2011.

**Material and Methods:** After surgical removal of ovarian tissue in the Gynaecological Clinic of Dresden University, the tissue was sent to the Gynaecological Clinic of Bonn University in a special transport container at 5°C and was frozen the next day using 1.5 M dimethyl sulfoxide cryosolution. In 2010 this ovarian tissue was thawed using a sucrose solution in the Gynaecological Clinic of Erlangen University Clinical Centre and was laparoscopically re-transplanted into the patient.

**Results:** The patient became pregnant, the pregnancy was uneventful, and she gave birth to a healthy boy.

**Conclusion:** Freezing of ovarian tissue with subsequent re-transplantation as described here is a viable method to preserve fertility in cancer patients.

les Leben führen. Dazu gehört auch die Erfüllung des Kinderwunschs [1]. Da eine Chemotherapie – je nach gewähltem Therapieschema – gonadotoxisch sein kann, ist evtl. mit einer irreversiblen Einschränkung oder einem vollständigen Verlust der ovariellen Reserve zu rechnen. Eine vieler-

**eingereicht** 24.2.2012  
**revidiert** 31.7.2012  
**akzeptiert** 7.8.2012

### Bibliografie

**DOI** <http://dx.doi.org/10.1055/s-0032-1327812>  
Geburtsh Frauenheilk 2012; 72: 1–6 © Georg Thieme Verlag KG  
Stuttgart · New York ·  
ISSN 0016-5751

### Korrespondenzadresse

**Dr. Vladimir Isachenko**  
Universitätsfrauenklinik Köln  
Prittowitzstraße 43  
89075 Ulm  
v.isachenko@yahoo.com

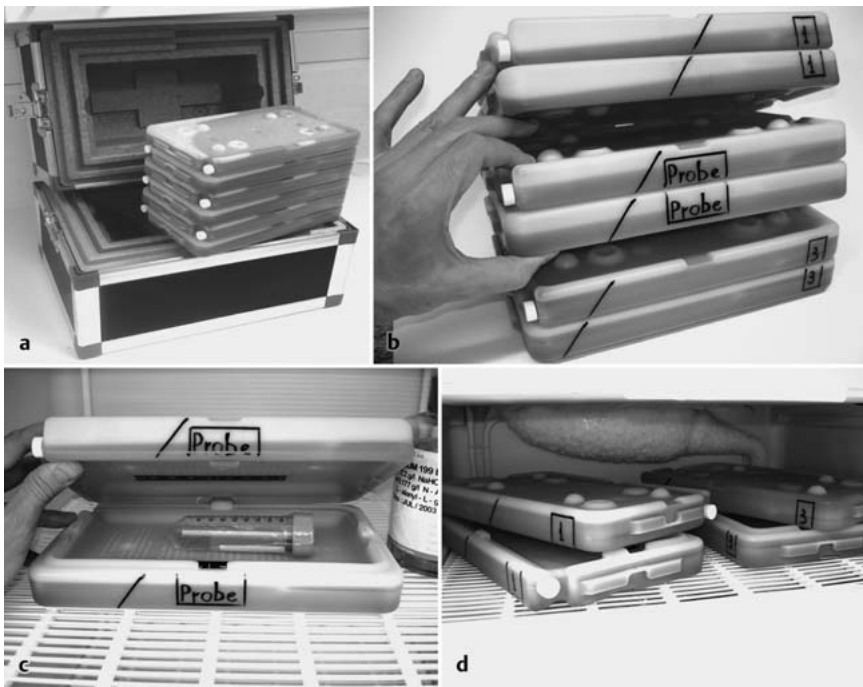

**Abb. 1 a bis d** Transport-Set für Ovarialgewebe.  
**a** Komplettes Transport-Set mit Kühlelementen.  
**b** Drei Elemente: Kühlelement 1 und 3 und das mittlere, die Proben enthaltende Element.  
**c** Mittleres, bis 4°C gekühltes Probeelement 2 mit Transportmedium.  
**d** Äußere, bis -20°C gekühlte Kühlelemente 1 und 3.

sprechende Methode zum Fertilitätserhalt bei den betroffenen Frauen ist die Kryokonservierung von Ovarialgewebe mit anschließender orthotoper Replantation nach überstandener rezidivfreier Krebserkrankung [2,3]. Weltweit gibt es bisher mehr als 25 publizierte Geburten nach orthotoper Replantation von kryokonserviertem Ovarialgewebe. Auch in Deutschland kam es 2011 zur ersten Geburt nach Replantation von kryokonserviertem Ovarialgewebe [4].

Eine 25-jährige Patientin erkrankte im Jahr 2003 an einem Hodgkin-Lymphom. Da die Patientin aus Dresden stammt, wurde zum Erhalt der Fertilität Ovarialgewebe an der Frauenklinik des Universitätsklinikums Dresden laparoskopisch entnommen. Die Kryokonservierung erfolgte in Bonn, da in Dresden nicht routinemäßig Ovarialgewebe kryokonserviert wird. Dazu wurde das Gewebe in einem geeigneten Transportbehälter an die Frauenklinik des Universitätsklinikums Bonn transportiert. Dort erfolgten die Kryokonservierung und die Lagerung der Gewebeproben.

Die Transplantation in Erlangen erfolgte aufgrund der Expertise der Frauenklinik des Universitätsklinikums Erlangen auf dem Gebiet des Auftauens und der Replantation von Ovarialgewebe. Nach 5 Jahren Rezidivfreiheit und weiter bestehendem Kinderwunsch wurde im Jahr 2010 an der Frauenklinik des Universitätsklinikums Erlangen die laparoskopische Replantation des aufgetauten Ovarialgewebes in eine Peritonealtasche im Bereich der Fossa ovarica der rechten Beckenwand durchgeführt. Drei Monate nach Replantation trat die erste spontane Menstruationsblutung auf, und es wurde eine niedrig dosierte Stimulationstherapie mit follikelstimulierendem Hormon (FSH) durchgeführt. Nach dem Nachweis eines dominanten Follikels im Bereich des Transplantats wurde die Ovulation mit humanem Choriongonadotropin (hCG) ausgelöst und Verkehr zum Optimum empfohlen. Es trat eine Schwangerschaft ein, die vollkommen unauffällig verlief und am 10.10.2011 zur Geburt eines gesunden Jungen in der Universitätsfrauenklinik in Dresden führte [4].

In diesem Artikel wird die Methodik des Gewebetransports von Dresden nach Bonn, die Präparation und die Kryokonservierung des ovariellen Gewebes sowie die Methode des Auftauens und die Replantation detailliert beschrieben.

### Transport und Präparation von Ovarialgewebe für das Einfrieren

▼ Wenn nicht anders angegeben, wurden Chemikalien der Firma Sigma (Sigma Chemical Co., St. Louis, MO, USA) verwendet. Am 22.8.2005 erfolgte an der Frauenklinik des Universitätsklinikums Dresden die laparoskopische Entnahme von Ovarialgewebe zur Kryokonservierung. Im Rahmen des Netzwerks FertiPROTEKT wurde das Gewebe nach der Entnahme an die Frauenklinik des Universitätsklinikums Bonn versandt. Die entnommenen Ovarialgewebefragmente wurden innerhalb von 22 Stunden in einem speziellen Transportbehälter für Blutkonserven (☉ **Abb. 1**) unter Verwendung einer bis 4°C gekühlten Lösung für Ovarialgewebetransporte Brahma I (Cryo BioSystem, Paris, Frankreich) von Dresden nach Bonn verschickt. Inzwischen wird die Brahma-I-Lösung von der Firma Cryo Bio System nicht mehr hergestellt. Als Alternative zur Brahma-I-Lösung wird an der Frauenklinik des Universitätsklinikums Köln eine selbst hergestellte Lösung aus Leibovitz-L-15-Medium mit 5% SSS (Serum Ersatz, Irvine Sci., Santa Ana, CA, USA) für den Transport und für die Präparationen von Ovarialgewebe verwendet. An der Frauenklinik des Universitätsklinikums Bonn wurden am nächsten Tag die Ovarialgewebefragmente in das Brahma-II-Medium (CryoBioSystem, Paris, Frankreich) überführt (☉ **Abb. 2a**) und der Kortex mithilfe einer Pinzette und Skalpell Nr.22 teilweise vom Stroma getrennt (☉ **Abb. 2b**). Das Medium Brahma II von Cryo Bio System wird zurzeit ebenfalls nicht mehr produziert. Statt Brahma-II-Lösung kann man eine selbst hergestellte Lösung, wie Leibovitz-L-15-Medium mit 5% SSS, verwenden. Die Ovarialgewebefragmente wurden in 5–8 je 2–3 × 1,0–1,2 mm große Streifen zerteilt

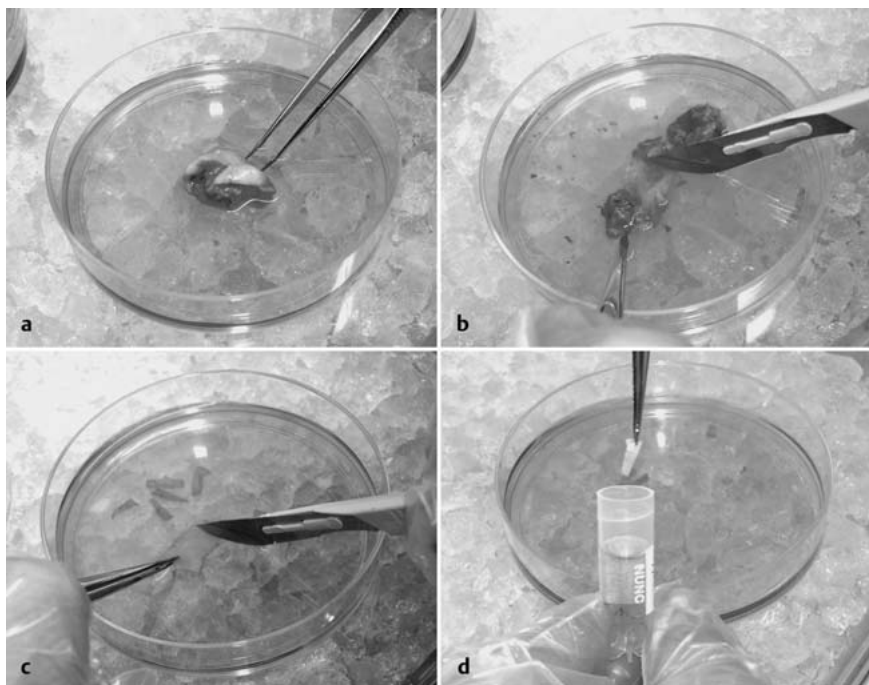

**Abb. 2 a bis d** Präparation der Ovarialgewebestreifen für das Einfrieren.

- a Ovarialgewebefragment nach dem Transport.
- b Teilweises Lösen der Medulla vom Kortex.
- c Zerteilung des Kortex in Streifen.
- d Überführung des Kortexstreifens in die Einfrierlösung.

(**Abb. 1 c**) und in 2-ml-Kryo-Röhrchen (Nunc, Roskilde, Dänemark) (**Abb. 1 d**) für das Einfrieren transferiert.

### Einfrieren von Ovarialgewebe

Zum Einfrieren des Ovarialgewebes wurden 2-ml-Standard-Kryo-Röhrchen (Nunc, Roskilde, Dänemark) mit 1,8 ml Einfrierlösung, bestehend aus L-15-Medium (Leibovitz) mit L-Glutamin + 1,5 M (11,7%) DMSO + 10% SSS befüllt. Die ovariellen Gewebestreifen wurden in die Kryo-Röhrchen eingebracht, für 30 min im Eiswasser gehalten (**Abb. 3 a**) und anschließend im IceCube 14S freezer (SyLab, Neupurkersdorf, Österreich) (**Abb. 3 b**) eingefroren. Das Einfrierprogramm war wie folgt: (1) Starttemperatur 4 °C, (2) Abkühlung von 4 bis -6 °C mit einer Geschwindigkeit von -1 °C/min, (3) Autoseeding bei -6 °C, (4) Abkühlung von -6 bis -34 °C mit einer Geschwindigkeit von -0,3 °C/min und schließlich Eintau-

chen der Kryo-Röhrchen in flüssigen Stickstoff (**Abb. 3 c**). Es erfolgte dann der Transfer in die Kryobank und die dortige Lagerung (**Abb. 3 d**).

### Auftauen von Ovarialgewebe

Das Auftauen des Ovarialgewebes erfolgte an der Frauenklinik des Universitätsklinikums in Erlangen. Dazu wurden die Kryo-Röhrchen mit den Ovarialgewebefragmenten für 30 s bei Raumtemperatur stehen gelassen und danach für 1 min in ein 37 °C warmes Wasserbad getaucht, bis das Eis vollständig geschmolzen war. Nach dem Auftauen wurden die Ovarialgewebestücke aus den Kryo-Röhrchen in 5 ml Auftauung (0,75 M Sucrosetlösung in PBS mit 10% Humanalbuminlösung [5%iges HSA]) für 15 min bei Raumtemperatur überführt. Danach wurden die Gewebefragmente zunächst für 15 min in 0,5 M Sucrosetlösung, dann für

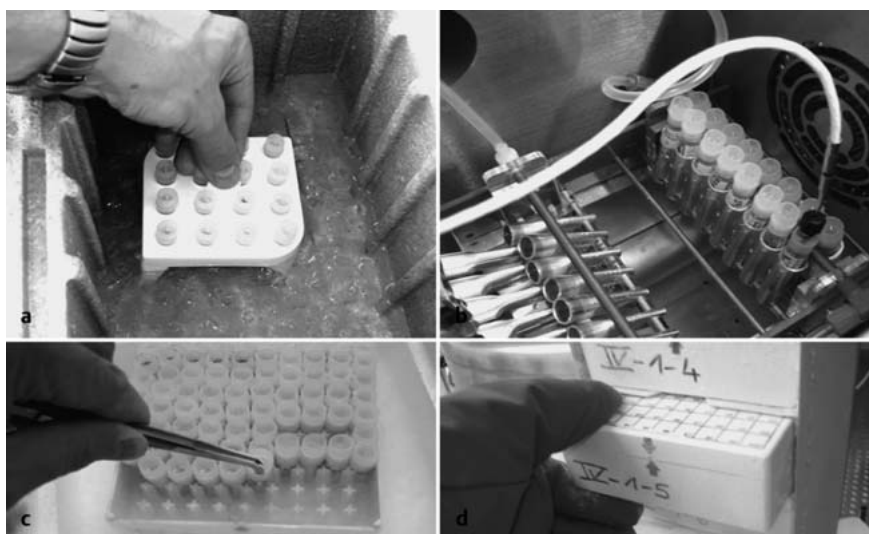

**Abb. 3 a bis d** Kryokonservierung des Ovarialgewebes.

- a Abkühlung der Kryo-Röhrchen im Eisbad bis 4 °C.
- b Einfrieren des Kryo-Röhrchens: Autoseeding-Block.
- c Eintauchen der Kryo-Röhrchen in flüssigen Stickstoff nach Abkühlung bis -34 °C.
- d Lagerung der Kryo-Röhrchen.



15 min in 0,25 M Sucroslösung und anschließend in PBS überführt (jeweils mit 10% HSA-Lösung). Direkt danach erfolgte die Transplantation des Gewebes nach bereits beschriebener Technik [5].

## Diskussion

Weltweit werden eine Reihe verschiedener Verfahren zur Kryokonservierung von Ovarialgewebe erfolgreich verwendet. Geburten gab es bisher nur nach Anwendung des langsamen Einfrierverfahrens. Als Kryoprotektiva kamen Ethylenglykol, Propylenglykol und DMSO zum Einsatz. Auch das hier beschriebene Verfahren mit ausschließlich DMSO als Gefrierschutzlösung, welches zur Geburt des ersten Kindes nach Retransplantation von kryokonserviertem Ovarialgewebe in Deutschland geführt hat, eignet sich, um Ovarialgewebe einzufrieren. An der Frauenklinik des Universitätsklinikums Köln wird zurzeit ein modifiziertes Einfrierverfahren angewandt, welches neben DMSO auch Ethylenglykol als Kryoprotektant benutzt [5–10]. Die neue Einfrierlösung besteht aus: L-15-Medium (Leibovitz) mit L-Glutamin +6% DMSO +6% Ethylenglykol +0,15 M Saccharose +10% Serumersatz (SSS).

Bei der Kryokonservierung ist die Initiierung der Kristallbildung im Einfrierprozess besonders wichtig, da es ohne die initiierte Kristallbildung zu einer sogenannten spontanen Kristallbildung bei etwa  $-18^{\circ}\text{C}$  kommt. Dabei wird Kristallisationswärme freigesetzt, die sich indirekt schädlich auf biologische Strukturen auswirken. Die Abkühlgeschwindigkeit bis zum Moment des Seeding spielt keine entscheidende Rolle. Nach dem Seeding muss die Abkühlgeschwindigkeit  $-0,3^{\circ}\text{C}/\text{min}$  betragen.

Im Januar 2005 wurde an der Universitätsfrauenklinik Bonn ein Gerät (Block) für das Autoseeding konzipiert und hergestellt. Der Prototyp dieses Geräts ist in **Abb. 3b** dargestellt. Unter Verwendung dieses Prototyps wurde das Ovarialgewebe in dem hier beschriebenen Fall eingefroren und das Seeding durchgeführt. Der Autoseeding-Block funktioniert nach dem folgenden Prinzip. Für die Initiierung des Seeding wird zu einem bestimmten Zeitpunkt (nach unserem Protokoll bei  $-6^{\circ}\text{C}$ ) über ein Metallrohr flüssiger Stickstoff geleitet. Über einen mechanischen Kontakt des Kryoröhrchens mit dem stickstoffgefüllten Metallrohr wird durch thermische Übertragung das Seeding initiiert. Die Besonderheit der Konstruktion des Autoseeding-Blocks besteht darin, dass der Kontakt zwischen den Kryoröhrchen und dem Seeding-Rohr passiv ist. Dies erfolgt ohne jegliche Federn, sondern nur über die Schwerkraft. Das Kryoröhrchen mit der Kryo-Lösung wird durch das Eigengewicht gegen das Seeding-Rohr gedrückt.

Die Kölner Arbeitsgruppe empfiehlt folgendes alternatives Auftauprotokoll mit kontinuierlicher Zugabe des Auftaumediums. Hierzu werden die Kryoröhrchen zuerst für 30 s bei Raumtemperatur stehen gelassen und danach für eine Zeitdauer von 60 bis 75 s in ein kochendes Wasserbad ( $100^{\circ}\text{C}$ ) eingetaucht. Die genaue Zeit der Exposition der Kryoröhrchen im kochenden Wasser wird visuell durch das Vorhandensein von Eis kontrolliert: Sobald das Eis an der Spitze  $\sim 1$  mm beträgt, wird das Röhrchen aus dem kochenden Wasser herausgenommen. Die endgültige Temperatur der Einfrierlösung liegt nach dem Entfernen des Kryoröhrchen aus dem  $100^{\circ}\text{C}$ -Wasserbad zwischen  $4$  und  $10^{\circ}\text{C}$ .

Beim Auftauen im kochenden Wasser kann es zu Überhitzung des Ovarialgewebefragments kommen. Um dies zu vermeiden, wird folgendes empfohlen. Zunächst wird ein Stofftampon (Telaprep Nr. 1, Paul Hartmann AG, Heidenheim, Deutschland) auf dem Bo-

den des 5-ml-Kryoröhrchens platziert. Danach wird das Ovarialgewebefragment auf den Stofftampon gelegt. Dadurch wird der direkte Kontakt des Gewebes mit den Wänden des 5-ml-Kryoröhrchens verhindert, was zu einer schnellen und gleichzeitig „delikaten“ Erwärmung des Ovarialgewebefragments führt.

Nach dem Auftauen werden die Ovarialgewebestreifen innerhalb von 5–7 s in einen 100-ml-Proben-Container (Sarstedt, Nümbrecht, Deutschland) mit 10 ml Lösung (0,5 M Saccharose + 10% SSS + L-15-Medium) zur Entfernung der Kryoprotektiva übertragen.

Die Entfernung der Kryoprotektiva erfolgt nach dem gleichen Prinzip wie die Saturation von Ethylenglykol (siehe Abbildung 1 aus Isachenko et al., 2006 [7]). Der Container wird auf einem Schüttler ständig in Bewegung gehalten (200 osc/min für 15 min bei Raumtemperatur). Die mehrstufige Rehydrierung der Ovarialgewebestreifen wird für 30 min bei Raumtemperatur durchgeführt. Für die Drop-Rehydrierung werden 50 ml Kulturlösung (L-15-Medium + 10% DSS) in 50-ml-Röhrchen (Greiner Bio-One GmbH, Frickenhausen, Deutschland) benutzt. Diese Methodik erfordert die langsame Zugabe (Drop) einer Kulturlösung zur Sucroslösung. Die endgültige Sucrosekonzentration beträgt  $0,083$  M, das praktisch der isotonischen Konzentration entspricht. Anschließend werden die Ovarialgewebestreifen in Kulturmedium 10 min lang gewaschen.

Im Allgemeinen ist es wichtig, dass der Transport und die Präparation der Ovarialgewebestreifen unter konstant niedrigen Temperaturen stattfinden, um die Vitalität des Gewebes zu erhalten (**Abb. 1** und **2**). Nachfolgend beschreiben wir kurz die Ergebnisse der ab August 2005 durchgeführten eigenen Versuche an der Universitätsfrauenklinik Köln. Das allgemeine Ziel der Untersuchungen war, den Einfluss von niedrigen positiven Temperaturen auf die Lebensfähigkeit des menschlichen Ovarialgewebes zu überprüfen und einen Benefit nachzuweisen oder zu widerlegen. Es wurde der Einfluss einer 24-stündigen Abkühlung auf eine Temperatur von  $5^{\circ}\text{C}$  direkt vor dem Einfrieren des Ovarialgewebes untersucht. Als Qualitätsmarker wurden die Intensität der Neovaskularisation und die Follikelentwicklung beobachtet und bewertet.

Die Daten über neutrale und sogar positive Effekte einer Kühlung auf das Gewebe sind bereits beschrieben und diskutiert worden. Es konnte gezeigt werden, dass die Anpassung von Warmblütern (Ratten) an Kälte durch Mitosestimulation begleitet wird.

Analysen der Hypothalamusgewebefunktion zeigten, dass kalte Temperaturen eine 2-fache Erhöhung der Thyreotropin-releasing-Hormon-mRNA-Synthese bewirkten [11].

Darüber hinaus wurde ein gutes Überleben von trophoblastischen Fragmenten, die einer Kühlung für 48 h bei  $4^{\circ}\text{C}$  unterzogen wurden, gezeigt. Die Überlebensrate war im Vergleich zu unbehandelten Kontrollen nicht anders (jeweils 98 und 98%) [12].

Es wurde beschrieben, dass menschliches Ovarialgewebe bei niedrigen positiven Temperaturen bei einer Lagerung bis zu 26 h keine hemmende Wirkung der Follikelentwicklung bei der späteren In-vitro-Kultur aufweist. Im Vergleich zu den unbehandelten Kontrollen war die Zahl der Primordialfollikel in allen Behandlungsgruppen aufgrund der Entwicklung in fortgeschrittene Stadien signifikant verringert [13]. Interessante Untersuchungen wurden von Wood et al. durchgeführt [14].

Es wurde der Einfluss einer langfristigen Lagerung bei Hypothermie von Hauskatzenovarien während 48 h bei  $4^{\circ}\text{C}$  auf die Follikelatresie untersucht. Es wurde ein positiver Effekt festgestellt. Wie nachfolgend beschrieben, stützen unsere Daten diese Ergebnisse.

Allerdings gibt es die Untersuchung von Yin et al. [15], wonach sich eine hypotherme Lagerung von Ratteneierstöcken bei 4 °C für 24 h nicht störend auf die Funktion der Eierstöcke auswirkt. Obwohl die Eierstöcke weniger Follikel zeigten, widerspricht dies den Ergebnissen der Kölner Arbeitsgruppe. Wir können dieses Phänomen als speziesspezifische Besonderheit erklären.

Der wichtigste Faktor für eine erfolgreiche Transplantation von Ovarialgewebe ist die rasche Gewährleistung einer ausreichenden Durchblutung. Dies ist entscheidend für das Überleben von Eibläschen [16].

Unter Berücksichtigung, dass die Neovaskularisation wichtig für die Einnistung und Entwicklung von Ovarialgewebe ist, hat die Kölner Arbeitsgruppe diese als Kriterium der Lebensfähigkeit für dieses Gewebe festgelegt und den Nachweis etabliert. Die Bildung neuer Gefäße aus bereits bestehenden ist von grundlegender Bedeutung für viele physiologische Prozesse. Eine Störung der Gefäßbildung führt zu vielen Erkrankungen, von Ischämie bis Krebs [17].

Tatsächlich beginnt die Neovaskularisation mit der Bildung von sehr kleinen Gefäßen. Für den Nachweis der Bildung dieser Gefäße hat die Kölner Arbeitsgruppe Desmin als Marker verwendet. In unseren Experimenten wurden menschliche Ovarialgewebestücke in folgende Gruppen unterteilt:

- ▶ Gruppe 1: gleich nach Operation kultivierte Stücke,
- ▶ Gruppe 2: nach der Operation auf 5 °C für 24 h abgekühlte und dann kultivierte Stücke,
- ▶ Gruppe 3: gleich nach Operation eingefrorene, aufgetaute und dann kultivierte Stücke,
- ▶ Gruppe 4: nach der Operation auf 5 °C für 24 h abgekühlte, eingefrorene, aufgetaute und dann kultivierte Stücke.

Die Kultivierung von Ovarialgewebefragmenten wurde im Chorionallantoismembran-(CAM-)System für 5 Tage durchgeführt. Der Einfluss der Kühlung auf die Follikel und die Intensität der Neovaskularisation wurde durch den Nachweis der Desmin-expression erfasst und ausgewertet. Es wurde die Erhöhung der Geschwindigkeit der Neovaskularisierung in Anwesenheit einer Desminexpression nachgewiesen. Die Intensität der Immunreaktivität wurde semiquantitativ beschrieben [18]: Mangel an Immunreaktivität (-), schwache Immunreaktivität (+), mäßige Immunreaktivität (++) , starke Immunreaktivität (+++).

Die histologische Untersuchung nach einer 5-Tage-CAM-Kultur von Ovarialgewebestücken zeigt, dass ursprüngliche, primäre und sekundäre Follikel lebensfähig waren.

Die Follikel einer normalen Qualität von 92, 93, 89 und 90% wurden in Gruppen 1, 2, 3 und 4, entsprechend ( $p > 0,1$ ) unterteilt.

Eine Immunreaktivität für Desmin wurde nur im medullaren Teil der Gewebestücke beobachtet. Folgende Punkte der Immunreaktivität wurden beobachtet:

- ▶ Gruppe 1 (gleich nach der Operation kultivierte Stücke): schwach (+),
- ▶ Gruppe 2 (nach der Operation auf 5 °C für 24 h abgekühlte Stücke): stark (+++),
- ▶ Gruppe 3 (gleich nach der Operation aufgetaute Stücke): Mangel (-),
- ▶ Gruppe 4 (nach der Operation auf 5 °C für 24 h abgekühlte und dann aufgetaute Stücke): mäßig (++) .

Die Ergebnisse weiterer beschriebener Experimenten zeigen, dass die 24-h-Abkühlung auf 5 °C vor der Kryokonservierung sich positiv auf das menschliche Ovarialgewebe auswirkt [19].

Unser Artikel beinhaltet teilweise früher publizierte Daten [4, 20]. Müller et al. stellen in ihrer Veröffentlichung medizinische Gesichtspunkte des gesamten Prozedere des Kryobankings von Ovarialgewebe vor [4]. In dieser Veröffentlichung [4] ist auch die erste Geburt nach Retransplantation von kryokonserviertem Ovarialgewebe in Deutschland beschrieben.

Es wurde gezeigt, dass onkologisch tätige Ärzte junge Patientinnen mit Tumorerkrankungen, die vor einer Strahlen- oder Chemotherapie stehen, vermehrt hinsichtlich der verschiedenen Möglichkeiten einer Fertilitätsprotektion informieren und beraten sollten.

Dittrich et al. [20] stellte den biologischen Teil des gesamten Kryobanking-Prozedere vor. Es wurde der Erfolg der Kryokonservierung des Ovarialgewebes nach einem längeren Transport unter Kühlung gezeigt. Zudem wurde angeregt, die Möglichkeiten zur Fertilitätsprotektion im Rahmen von onkologischen Behandlungen zu berücksichtigen und den Patientinnen eine Beratung durch die Mitglieder z.B. des Netzwerks FertiPROTEKT ([www.fertiprotekt.de](http://www.fertiprotekt.de)) anzubieten.

Weltweit sind bis jetzt mehr als 25 Geburten nach Retransplantation von kryokonserviertem Ovarialgewebe beschrieben [21].

Ziel der nun hier vorgestellten Veröffentlichung war, detailliert das Protokoll der Ovarialgewebe-Kryokonservierung zu beschreiben. Der Schwerpunkt hierbei liegt in der detaillierten Information, die direkt für die Erstellung der Laborprotokolle verwendet werden kann. Die Geburt des Kindes bestätigt die Verlässlichkeit dieses Protokolls. Allerdings beschränken wir uns nicht auf die Beschreibung der Technologien aus dem Jahr 2005, sondern stellen vielmehr modernere Versionen dieser Technologien vor. Es wurde dazu die praktische Anwendung der Ergebnisse der Experimente der Abkühlung von menschlichem Ovarialgewebe gezeigt. In der Frauenklinik des Universitätsklinikums Köln wird heute standardmäßig eine 22–23-h-Kühlung vor der Kryokonservierung von menschlichem Ovarialgewebe durchgeführt. Dem Leser wird so die Möglichkeit gegeben, sich selber zu entscheiden, ob dieser die Technologie aus dem Jahr 2005 verwenden möchte oder ob er sich für die in den letzten 6 Jahren entwickelte Technologie [2, 3, 6, 7, 19] entscheiden will.

## Interessenkonflikt

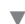

Nein.

## Institute

<sup>1</sup> Universitätsfrauenklinik Köln, Köln

<sup>2</sup> Frauenklinik des Universitätsklinikums Erlangen, Erlangen

<sup>3</sup> Universitätsfrauenklinik Dresden, Dresden

<sup>4</sup> Universitätsfrauenklinik Bonn, Bonn

<sup>5</sup> Universitätsfrauenklinik Heidelberg, Heidelberg

## Literatur

- 1 Krebs in Deutschland 2005/2006. Häufigkeiten und Trends. Eine gemeinsame Veröffentlichung des Robert Koch-Instituts und der Gesellschaft der epidemiologischen Krebsregister in Deutschland e.V. 2010: 120P
- 2 Dittrich R, Maltaris T, Hoffmann I et al. Fertility preservation in cancer patients. *Minerva Ginecol* 2010; 62: 63–80
- 3 von Wolff M, Montag M, Dittrich R et al. Fertilitätsprotektion bei Frauen. Empfehlungen des Netzwerks FertiPROTEKT. *Geburtsh Frauenheilk* 2010; 70: 85–100
- 4 Müller A, Keller K, Wacker J et al. Retransplantation von kryokonserviertem Ovarialgewebe: Erste Geburt in Deutschland. *Dtsch Arztebl Int* 2012; 109: 8–13

- 5 Mueller A, Oppelt PG, Renner SP et al. Erste Retransplantation von kryokonserviertem Ovarialgewebe nach Krebserkrankung in Deutschland mit anschließender Eizellgewinnung und ICSI-Behandlung. *Geburtsh Frauenheilk* 2009; 69: 124–130
- 6 Isachenko V, Isachenko E, Nawroth F et al. Genexpression und Morphologie der Follikel nach konventionellem Einfrieren und Vitrifikation von humanem Ovarialgewebe. *Geburtsh Frauenheilk* 2010; 70: 561–567
- 7 Isachenko V, Montag M, Isachenko E et al. Effective method for in-vitro culture of cryopreserved human ovarian tissue. *Reprod Biomed Online* 2006; 13: 228–234
- 8 Isachenko V, Nawroth F, Rahimi G et al. Die vaskularisierte Chorioallantoismembran (CAM): Ein Kultursystem für kryokonserviertes menschliches Ovarialgewebe als Alternative zur Xenotransplantation. *Geburtsh Frauenheilk* 2011; 71: 862–868
- 9 Isachenko V, Isachenko E, Rahimi G et al. Die Chorioallantoismembran des Huhns. Kultursystem für kryokonserviertes menschliches Ovarialgewebe. *Gynäkol Endokrinol* 2012; 10: 65–67
- 10 Isachenko V, Mallmann P, Petrunkina AM et al. Comparison of in vitro and chorioallantoic membrane (CAM)-culture systems for cryopreserved medulla-contained human ovarian tissue. *PLoS ONE* 2012; 7: e32549
- 11 Fiedler J, Jara P, Luza S et al. Cold stress induces metabolic activation of thyrotrophin-releasing hormone-synthesising neurones in the magnocellular division of the hypothalamic paraventricular nucleus and concomitantly changes ovarian sympathetic activity parameters. *J Neuroendocrinol* 2006; 18: 367–376
- 12 Isachenko V, Ostashko F, Grishchenko V et al. Survival of trophoblastic fragments and vesicles after vitrification, ultrarapid freezing, and storage at 4 degrees C. *Cryobiology* 1993; 30: 432–437
- 13 Isachenko E, Isachenko V, Nawroth F et al. Effect of long-term exposure at suprazero temperatures on activity and viability of human ovarian cortex. *Fertil Steril* 2009; 91: 1556–1559
- 14 Wood TW, Montali RJ, Wildt DE. Follicle-oocyte atresia and temporal taphonomy in cold-stored domestic cat ovaries. *Mol Reprod Dev* 1997; 46: 190–200
- 15 Yin H, Wang X, Kim SS et al. Transplantation of intact rat gonads using vascular anastomosis: effects of cryopreservation, ischemia and genotype. *Hum Reprod* 2003; 18: 1165–1172
- 16 Weissman A, Gottlieb L, Colgan T et al. Preliminary experience with subcutaneous human ovarian cortex transplantation in the NOD-SCID mouse. *Biol Reprod* 1999; 6: 1462–1467
- 17 Carmeliet P. Angiogenesis in health and disease. *Nat Med* 2003; 9: 653–660
- 18 Khan-Dawood FS, Yusoff Dawood M, Tabibzadeh S. Immunohistochemical analysis of the microanatomy of primate ovary. *Biol Reprod* 1996; 54: 734–742
- 19 Isachenko V, Mallmann P, Isachenko E et al. Long-time cooling of human ovarian tissue before cryopreservation as obvious procedure: stimulation of follicular development and neo-vascularisation. *Clin Lab* 2013; in press
- 20 Dittrich R, Lotz L, Keck G et al. Life birth after ovarian tissue autotransplantation following overnight transportation before cryopreservation. *Fertil Steril* 2012; 97: 387–390
- 21 Donnez J, Jadoul P, Pirard C et al. Live birth after transplantation of frozen-thawed ovarian tissue after bilateral oophorectomy for benign disease. *Fertil Steril* 2012; 98: 720–725
